# Supplementary material
Source: PubMed Central journal article supplement (PMC4303189)
Supplement: Supp_Figure1.pdf [file Supp_Figure1.pdf]

## Supplementary Data

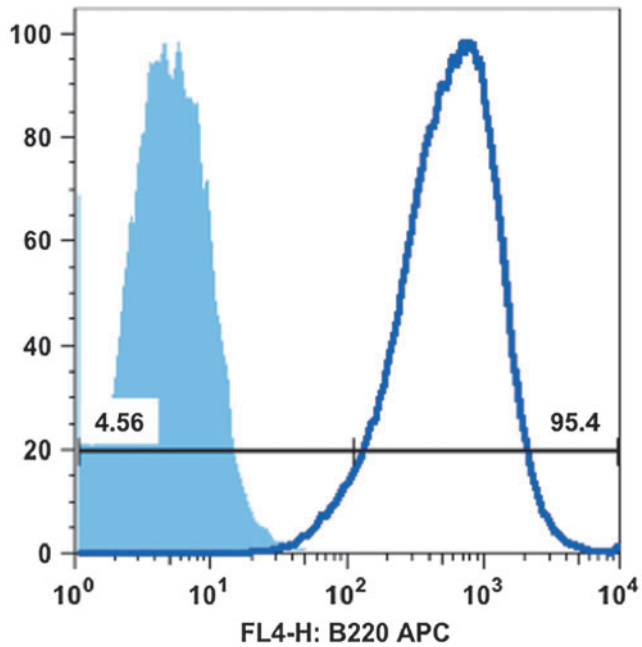

**SUPPLEMENTARY FIG. S1.** Expression of B220 in lymphoma tumors. Balb/C mice were injected with A20 cells on the right flank, and tumors were processed as described in the Materials and Methods section. The shaded blue histogram shows the isotype control, and the dark blue line shows B220 staining.
